# Supplementary material for: Divergent changes in the elevational gradient of vegetation activities over the last 30 years
Source: Springer Nature journal article supplement (doi:10.1038/s41467-019-11035-w), 2019-07-05
Supplement: 41467_2019_11035_MOESM1_ESM.pdf [file 41467_2019_11035_MOESM1_ESM.pdf]

## **Supplementary Information**

### **Divergent changes in the elevational gradient of vegetation activities over the last 30 years**

Gao et al.

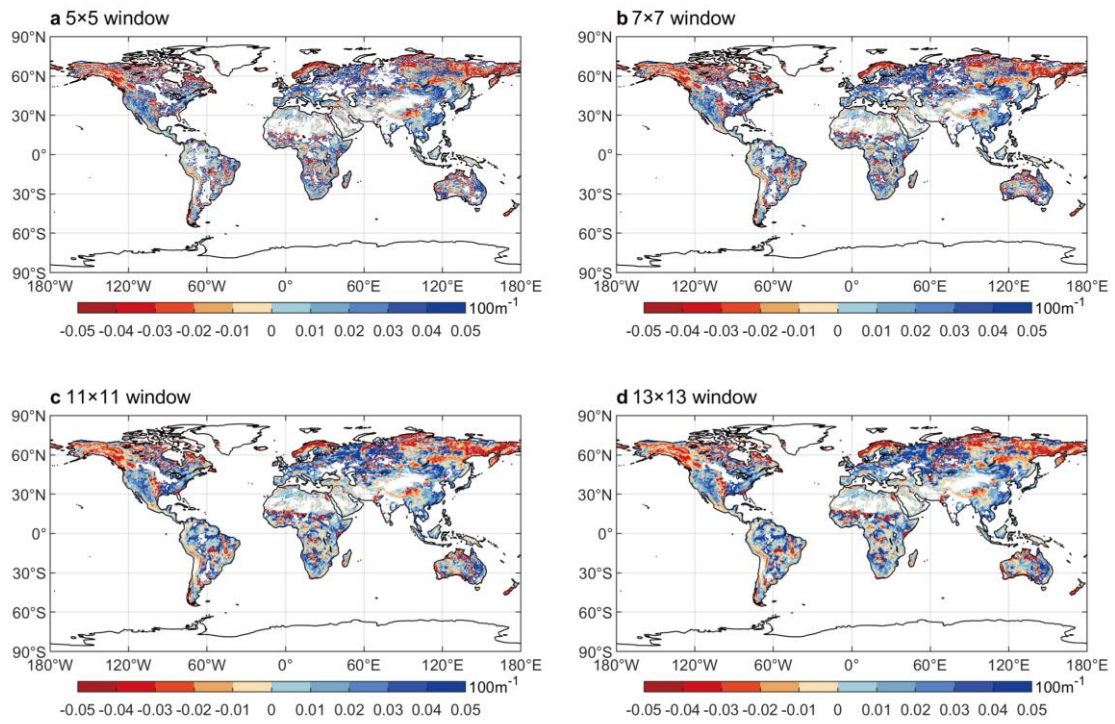

**Supplementary Fig. 1** The elevational gradient of NDVI<sub>max3</sub> (EG<sub>ndvimax</sub>) from 1982 to 2015. The same as Fig. 1a, but using different sized moving windows: (a) 5×5 moving windows, (b) 7×7 moving windows, (c) 11×11 moving windows, (d) 13×13 moving windows.

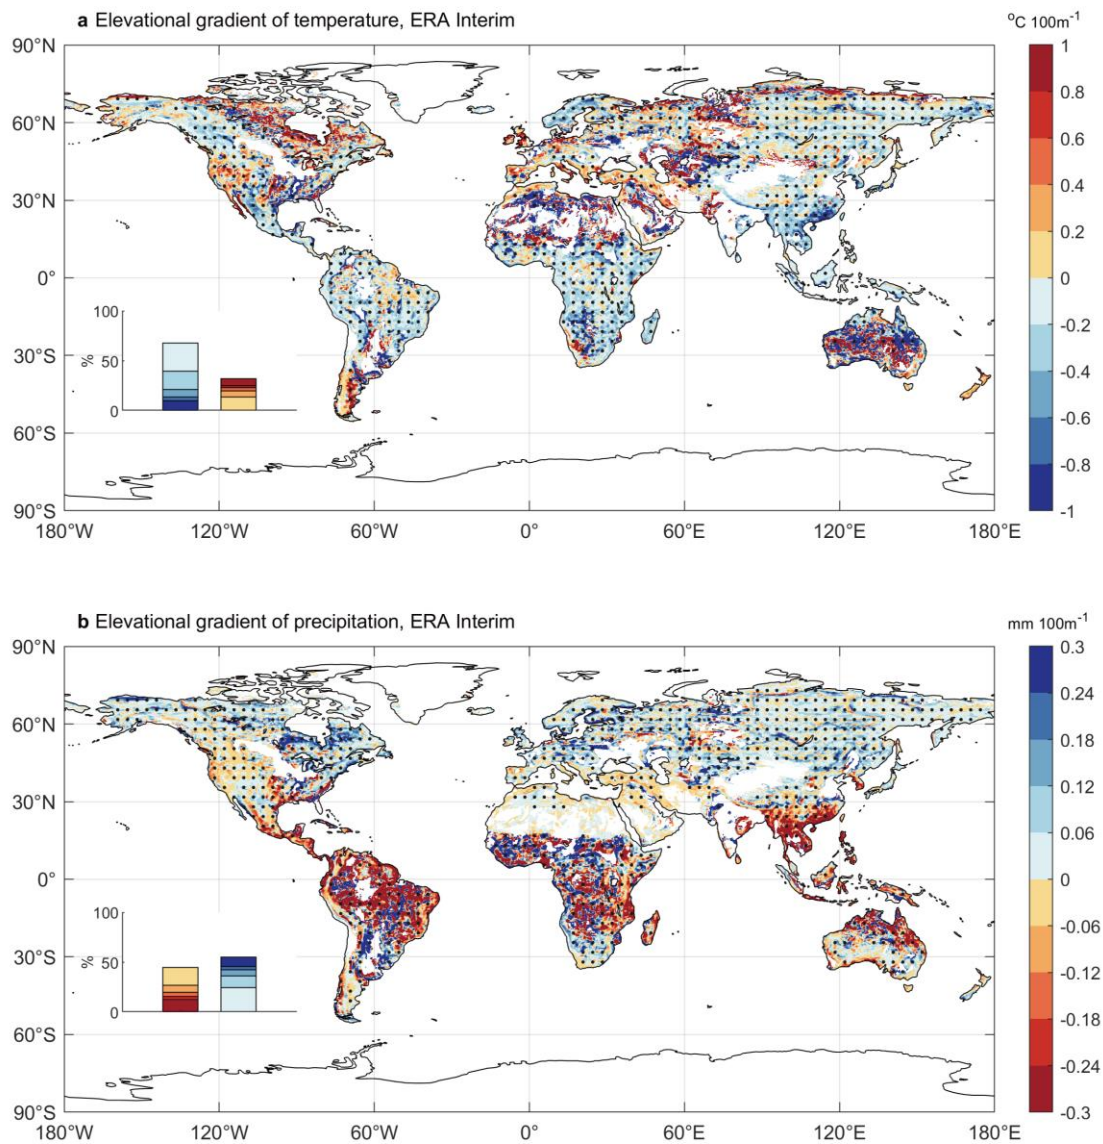

**Supplementary Fig. 2 The elevational gradient (EG) of climate variables.** Spatial patterns of the elevational gradient (EG) of (a) mean annual temperature and (b) average precipitation from the ERA Interim reanalysis dataset during 1982-2015. A frequency distribution of EG values is shown in the inset at the bottom-left for each panel. Regions marked with dots have statistically significant ( $p < 0.05$ ) EG values.

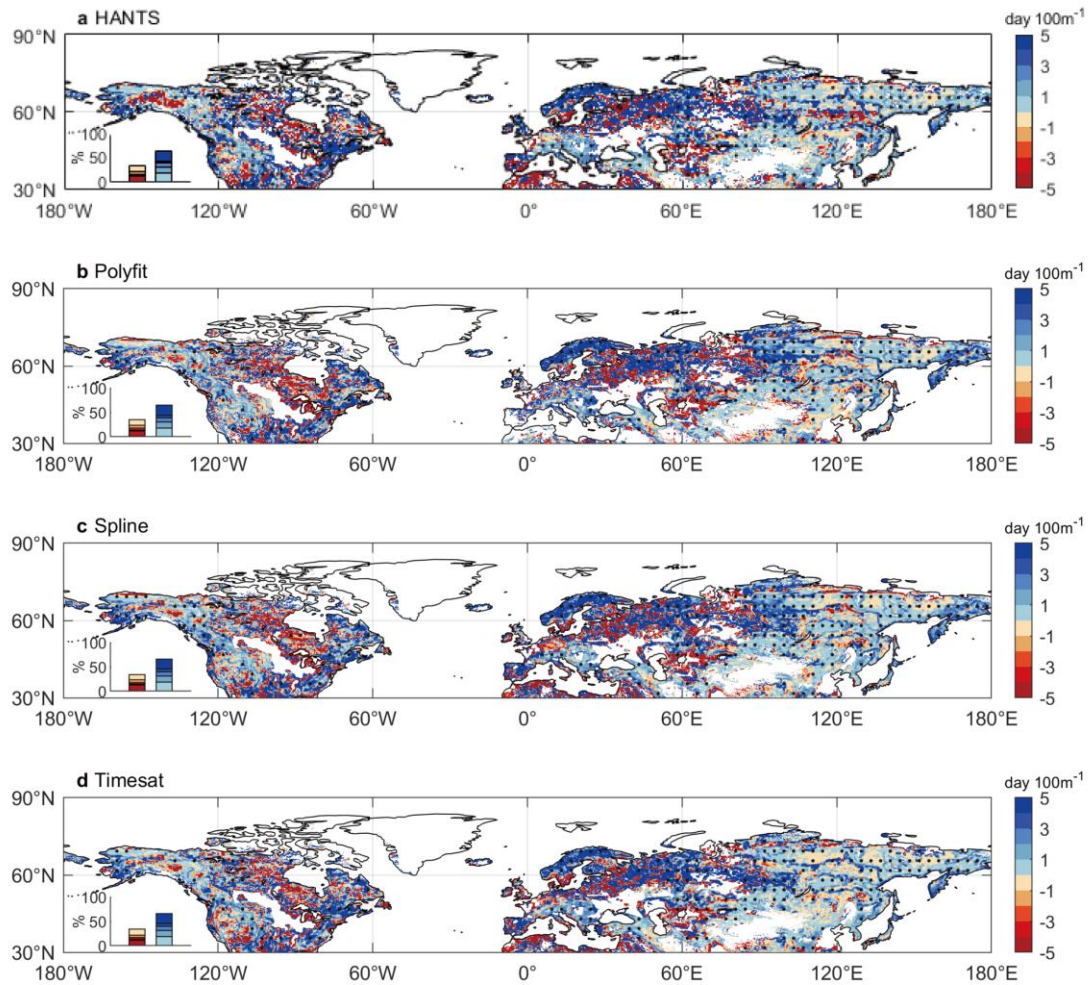

**Supplementary Fig. 3** The spatial patterns of elevational gradient of SOS (EG<sub>sos</sub>). The same as **Fig. 1b**, but with SOS data estimated by each of the four different methods: **(a)** HANTS, **(b)** Polyfit, **(c)** Spline and **(d)** Timesat (see Methods). A frequency distribution of EG values is shown in the inset at the bottom-left for each panel. Regions marked with dots have statistically significant ( $p < 0.05$ ) EG values.

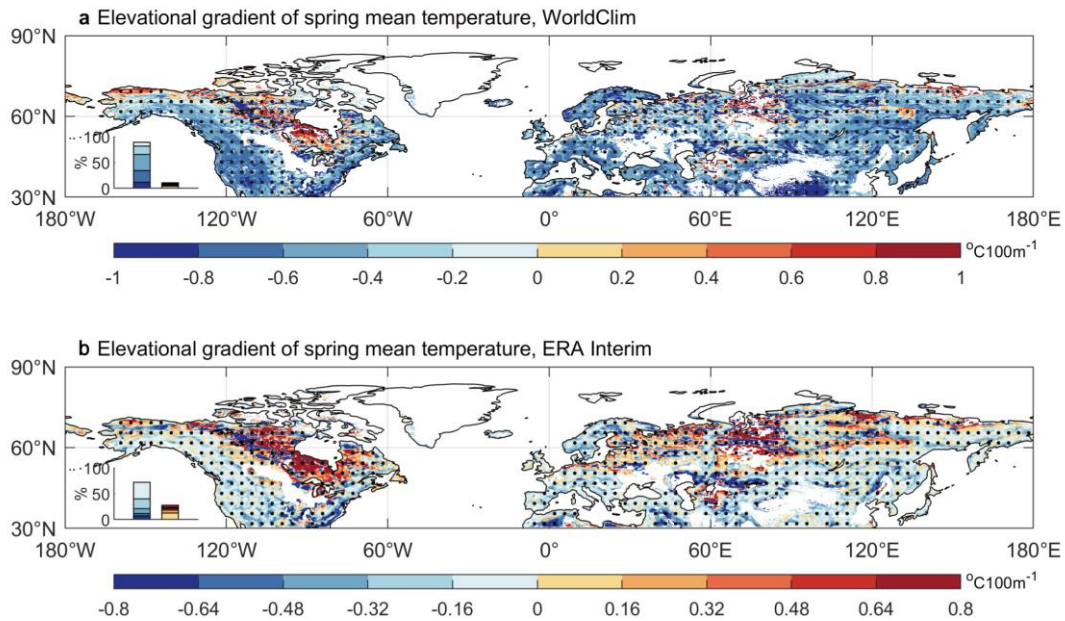

**Supplementary Fig. 4 The elevational gradient of spring temperature.** Spatial patterns of the elevational gradient (EG) of spring (March to May) mean temperature during 1982-2011 over the Northern Hemisphere (north of 30°N). The climate data were from the WorldClim dataset (**a**) and the ERA Interim reanalysis dataset (**b**). A frequency distribution of the EG values is shown in the inset at the bottom-left for each panel. Regions marked with dots have statistically significant ( $p < 0.05$ ) EG values.

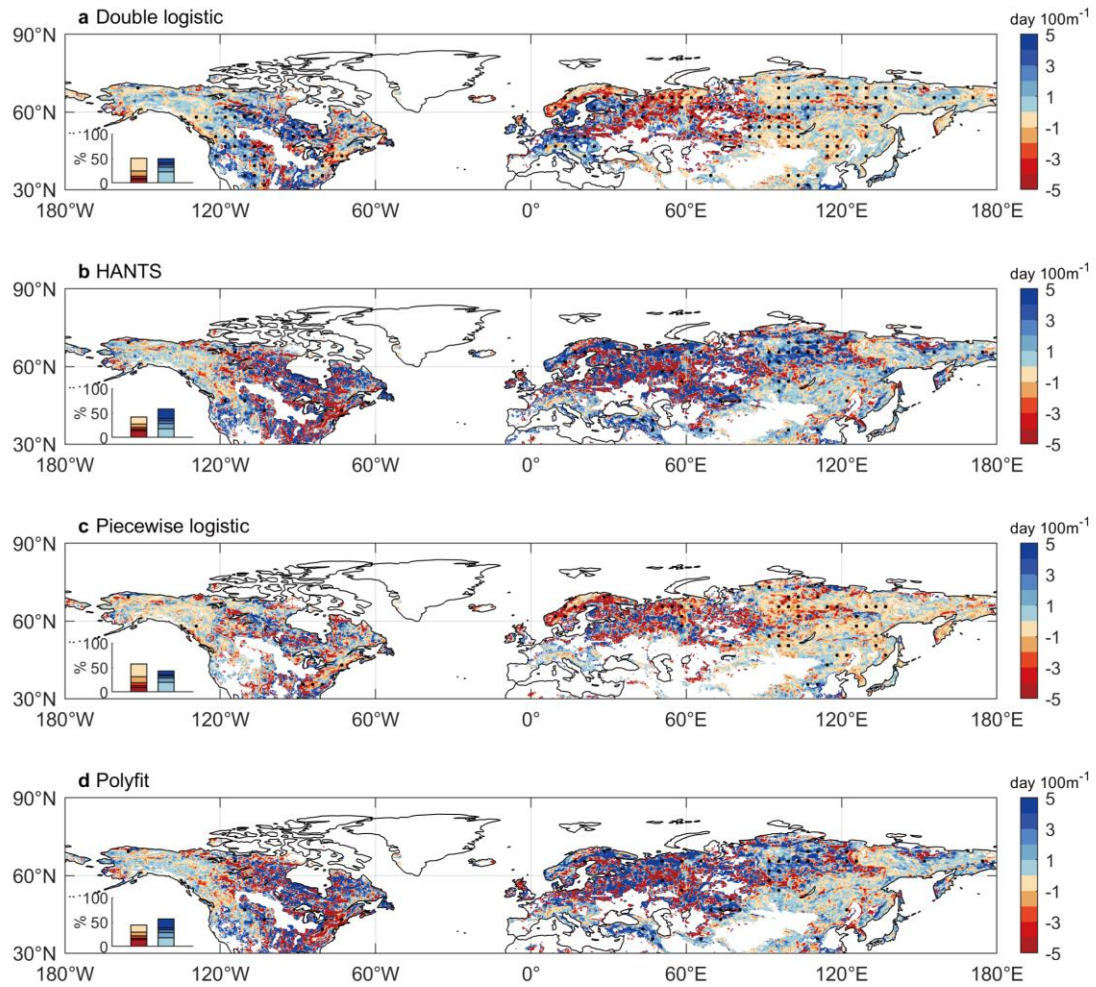

**Supplementary Fig. 5** The spatial patterns of elevational gradient of EOS (EG<sub>EOS</sub>). The same as **Fig. 1c**, but with EOS data estimated using each of the four different methods: (a) Double logistic, (b) HANTS, (c) Piecewise logistic and (d) Polyfit (see Methods). A frequency distribution of EG values is shown in the inset at the bottom-left for each panel. Regions marked with dots have statistically significant ( $p < 0.05$ ) EG values.

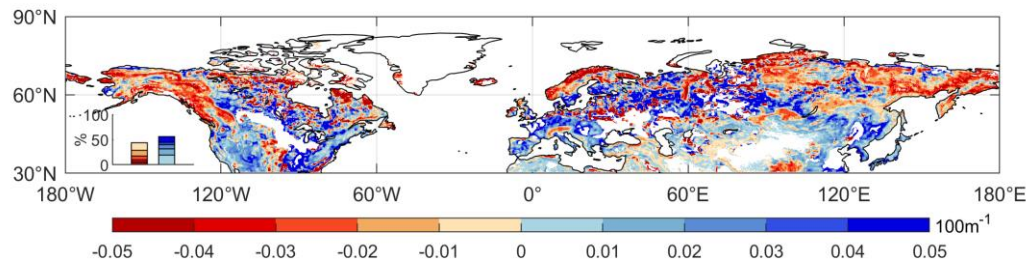

**Supplementary Fig. 6 Spatial patterns of the elevational gradient for the mean autumn (September to November) NDVI during 1982-2015. A frequency distribution of EG values is shown in the inset at the bottom-left.**

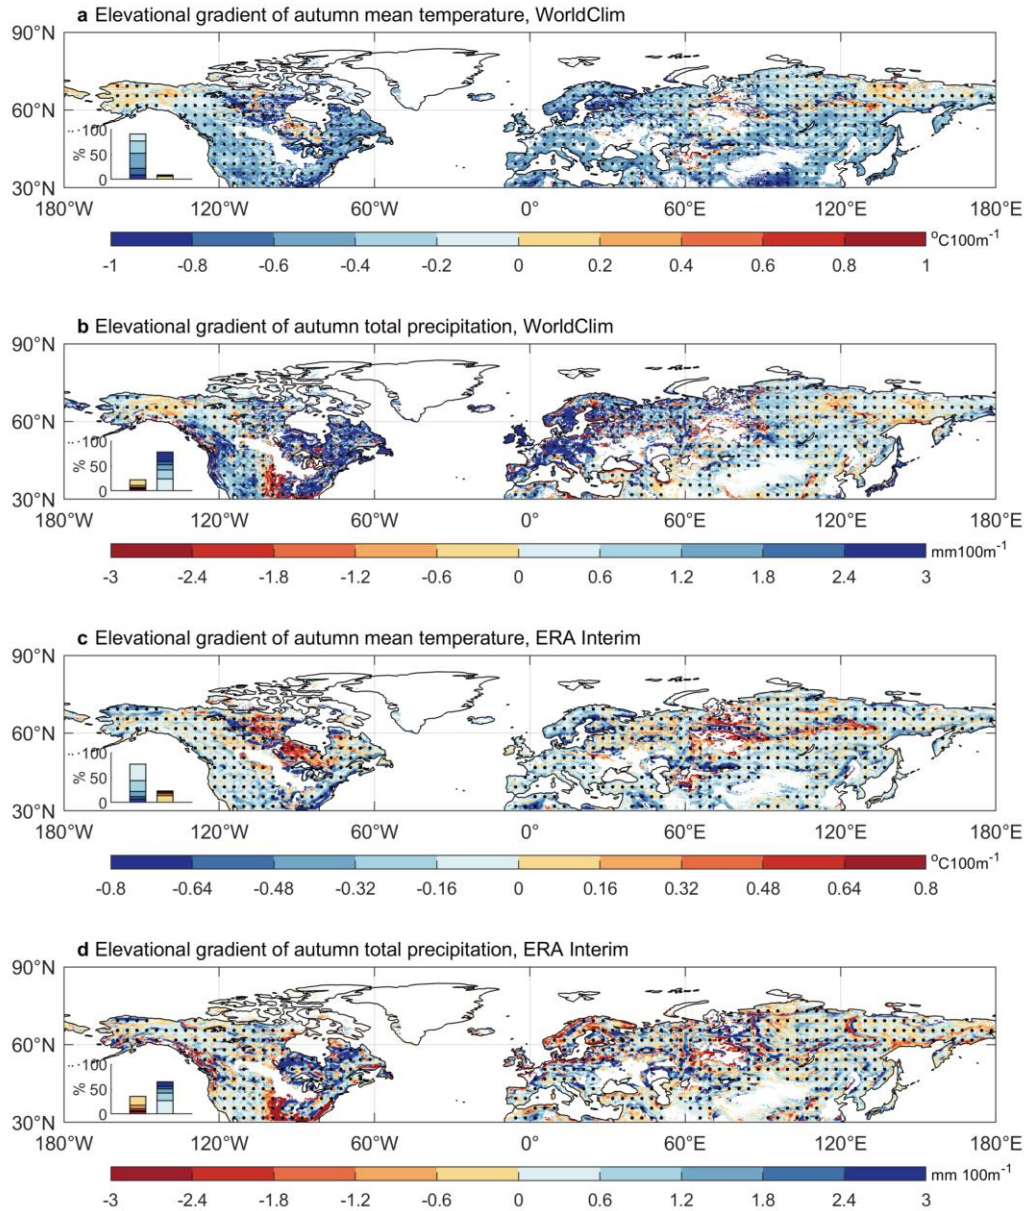

**Supplementary Fig. 7 The elevational gradient of autumn temperature and precipitation.** Spatial patterns of the elevational gradient of autumn (September to November) mean temperature (**a, c**) and total precipitation (**b, d**) during 1982-2011 over the Northern Hemisphere (north of 30°N). The climate data were from the WorldClim dataset (**a, b**) and the ERA Interim reanalysis dataset (**c, d**). A frequency distribution of EG values is shown in the inset at the bottom-left for each panel. Regions marked with dots have statistically significant ( $p < 0.05$ ) EG values.



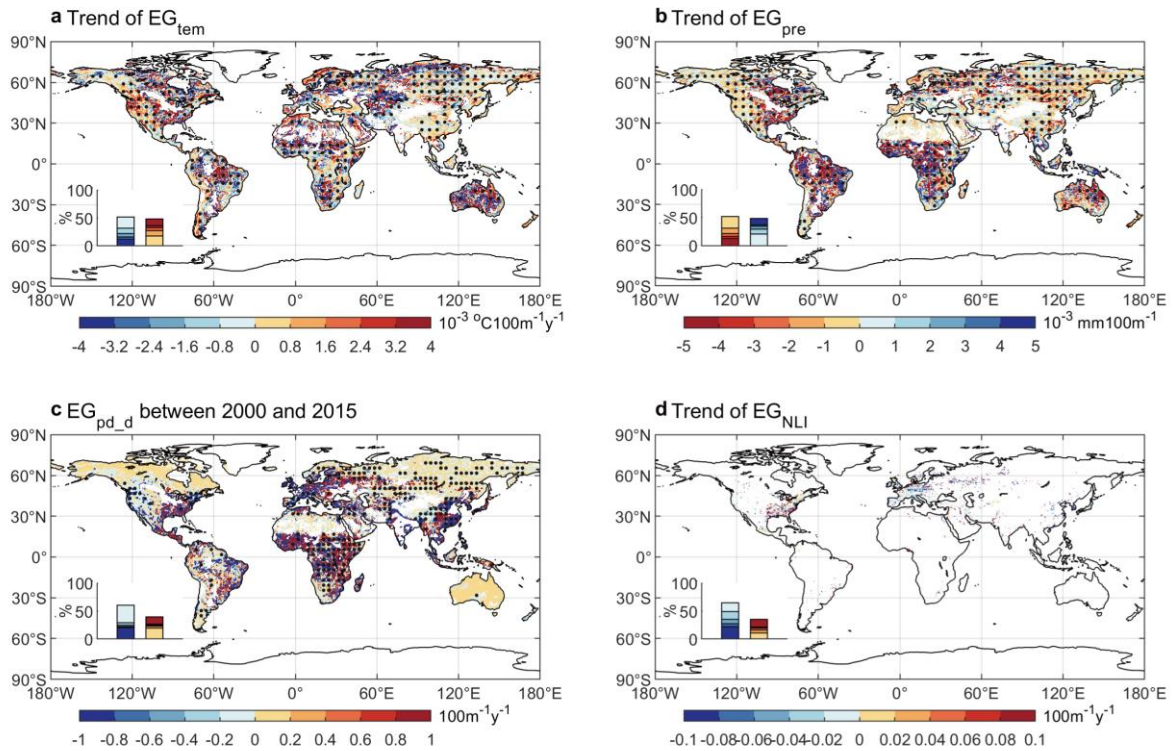

**Supplementary Fig. 8 Spatial patterns of the linear temporal trend for the elevational gradients of climate variables and human activity indices. a**, trend for the elevational gradient of mean annual temperature ( $EG_{tem}$ ) during 1982 to 2015. **b**, trend for the elevational gradient of average precipitation ( $EG_{pre}$ ) during 1982 to 2015. **c**, elevational gradient of the population density difference between 2015 and 2000 ( $EG_{pd\_d}$ ). **d**, trend for the elevational gradient of night light index ( $EG_{NLI}$ ) during 1992 to 2013. Climate data was from ERA Interim dataset (see Methods). A frequency distribution of EG values is shown in the inset at the bottom-left for each panel. Regions marked with dots have statistically significant ( $p < 0.05$ ) EG values.

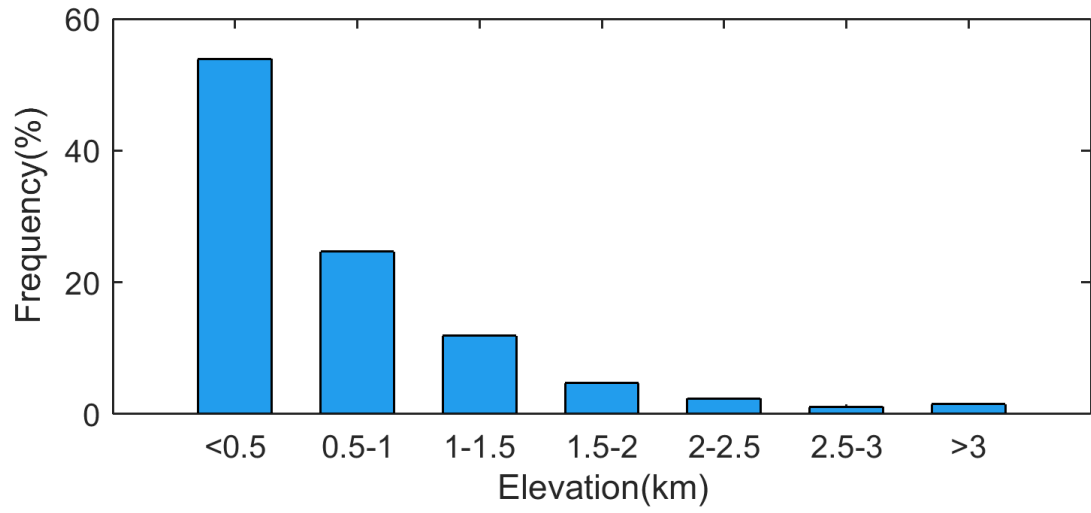

**Supplementary Fig. 9** The frequency distribution of afforestation areas in China at different elevations based on the forest plantation map (2004-2008) provided by Shushi Peng<sup>1</sup>.

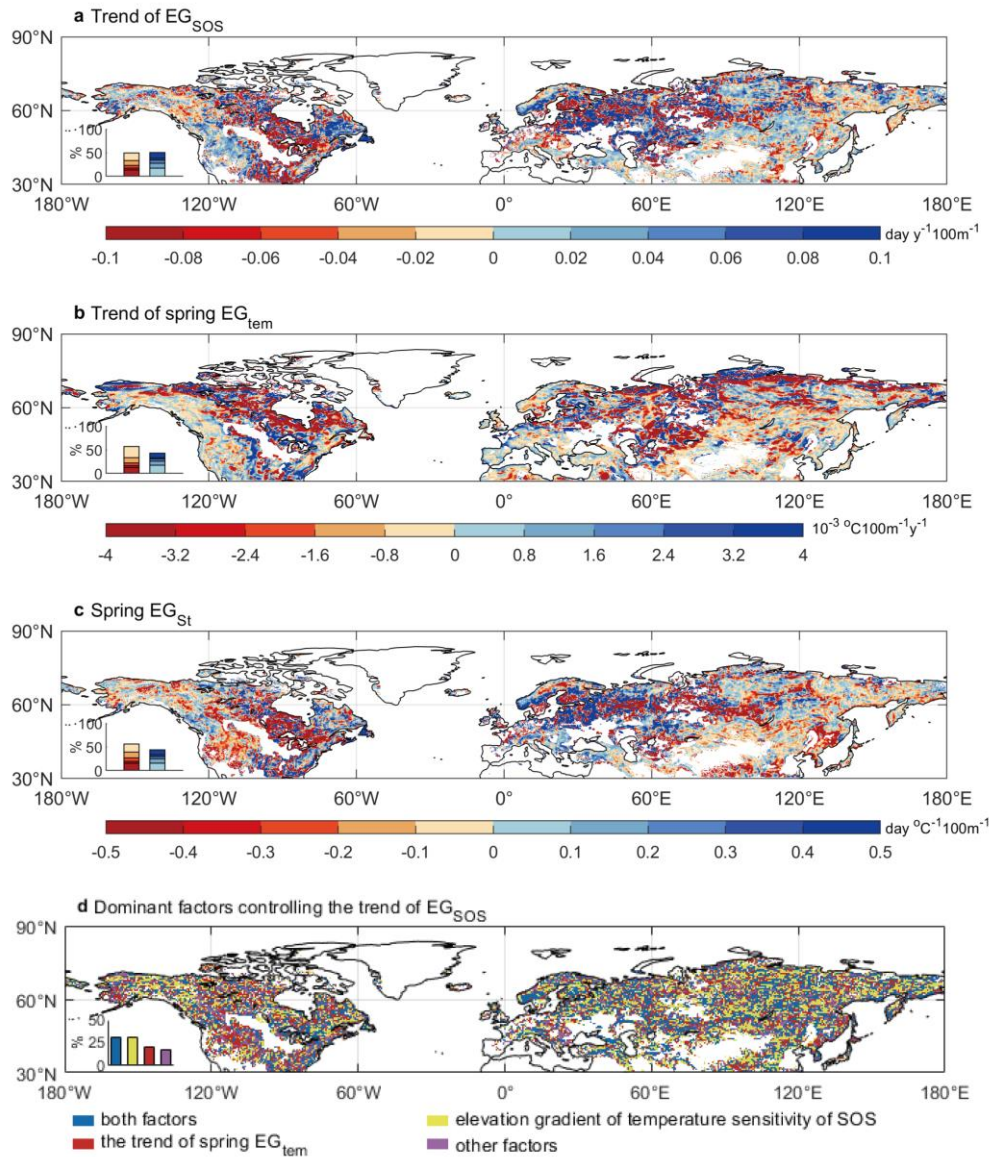

**Supplementary Fig. 10 The trend of  $EG_{SOS}$  and its driving factors.** **a**, spatial pattern of the linear trend of  $EG_{SOS}$  during 1982 to 2011. **b**, spatial pattern of the linear trend of the elevational gradients of spring (March to May) mean temperature (spring  $EG_{tem}$ ) during 1982 to 2011. A frequency distribution of the trend values is shown in the inset at the bottom-left for panels (**a**) and (**b**). **c**, spatial pattern of the elevational gradient of temperature sensitivity of SOS (see Methods). A frequency distribution of the EG values is shown in the inset at the bottom-left for panel (**c**). **d**, spatial pattern of dominant factors controlling the trend of  $EG_{SOS}$  (see Methods). A frequency distribution of grids controlling by different factors is shown in the inset at the bottom-left of panel (**d**).

**Supplementary Table 1. Scenarios of temperature and temperature sensitivity in controlling the trend of EGs<sub>sos</sub>**

| <b>Category</b> | <b>Temporal trend of EG<sub>sos</sub></b> | <b>Elevational gradient of temperature sensitivity of SOS</b> | <b>Temporal trend of spring EG<sub>tem</sub></b> |
|-----------------|-------------------------------------------|---------------------------------------------------------------|--------------------------------------------------|
| <b>(a)</b>      | +                                         | +                                                             | -                                                |
|                 | -                                         | -                                                             | +                                                |
| <b>(b)</b>      | +                                         | +                                                             | +                                                |
|                 | -                                         | -                                                             | -                                                |
| <b>(c)</b>      | +                                         | -                                                             | -                                                |
|                 | -                                         | +                                                             | +                                                |
| <b>(d)</b>      | +                                         | -                                                             | +                                                |
|                 | -                                         | +                                                             | -                                                |

## Supplementary Reference

1. Peng, S.-S. *et al.* Afforestation in China cools local land surface temperature. *Proc. Natl. Acad. Sci.* **111**, 2915–2919 (2014).
